# Supplementary material for: Multi-Trophic Species Diversity Contributes to the Restoration of Soil Multifunctionality in Degraded Karst Forests through Cascading Effects
Source: MDPI journal article supplement (doi:10.3390/f15030559), 2024-03-19
Supplement: s1 [file s1]

# Supplementary Materials

## Method of Soil Sample Collection

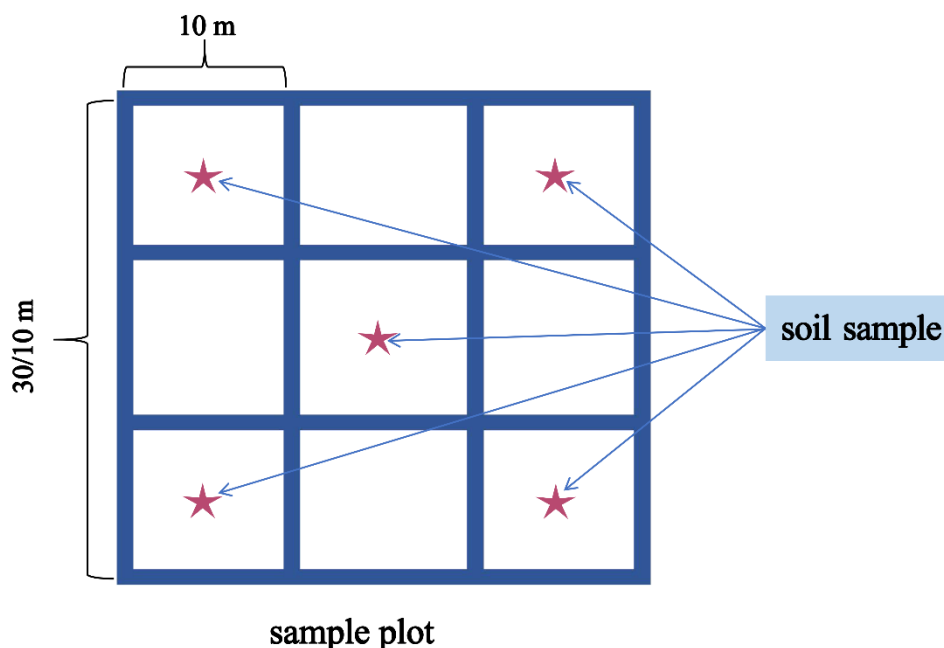

**Figure S1.** Diagram of the five-point sampling method. With the five-pointed star as the sampling point, 5 topsoil samples were taken from each sample site and mixed evenly (removing the topsoil litter), and visible rocks, impurities and plant debris in the soil were removed, with a total of 30 samples.

## Calculation Method of Soil Multifunctionality

Currently, there are several common ways to quantify ecosystem multifunctionality, Such as average value method, factor analysis method, threshold method etc. There are advantages and disadvantages to different approaches. The mean value method was first proposed by Hooper and Vitousek [1], and was also the first to use a comprehensive index to quantitatively characterize multiple ecosystem processes. The method represents ecosystem multifunctionality by calculating the average standardized scores of different ecosystem functions (Z scores), which provides a direct and easy-to-interpret method for quantifying the ability to maintain multiple ecosystem functions simultaneously. However, this approach does not consider the interrelationship between the functions of different ecosystems[2]. The factor analysis method can obtain the multifunctionality index similar to the average method. Firstly, dimensionality reduction of function index parameters is carried out, factor analysis is performed, and then the scores of each factor are obtained, and then the scores of each factor are used to represent the multifunctionality. This method can measure the tradeoff relationship between various functions to a certain extent. Threshold method is a new framework for computing multifunctionality. In this framework, cluster analysis is performed to identify closely related functions assigned to the same cluster. Each cluster is then assigned the same weight, and the functions within the cluster are equally weighted. Then the function index is calculated according to the threshold method, and the function weight of each site exceeds a certain threshold value is calculated.

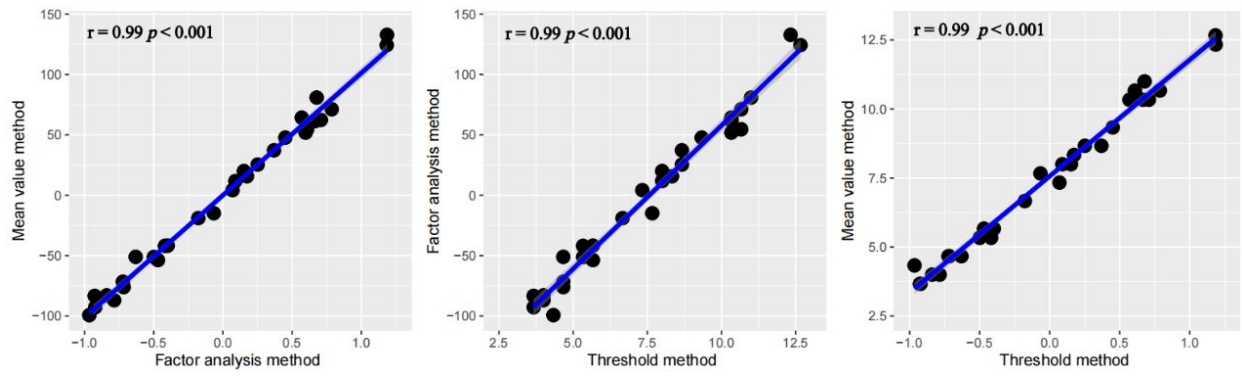

**Figure S2.** The linear relationship between soil multifunctional index was obtained based on mean value method, factor analysis method and threshold method.

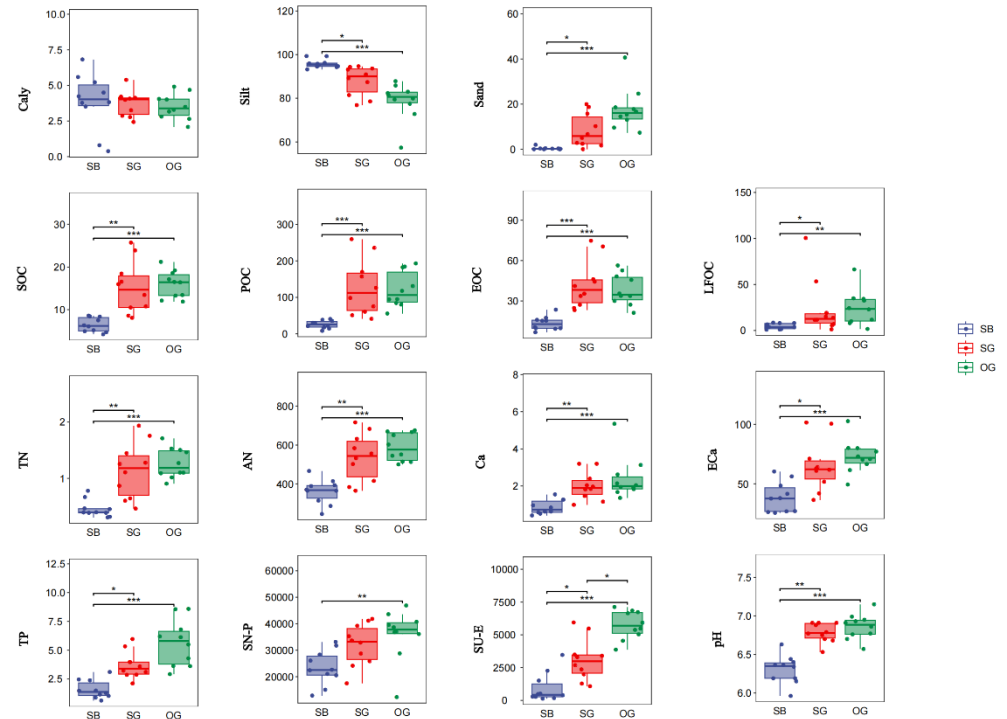

**Figure S3.** Changes in soil physico-chemical properties at different stages of restoration of degraded karst forests. The  $p$  value represents the total difference between groups and indicates the significance level of differences between groups (\*,  $p < 0.05$ ; \*\*,  $p < 0.01$ ; \*\*\*,  $p < 0.001$ ).

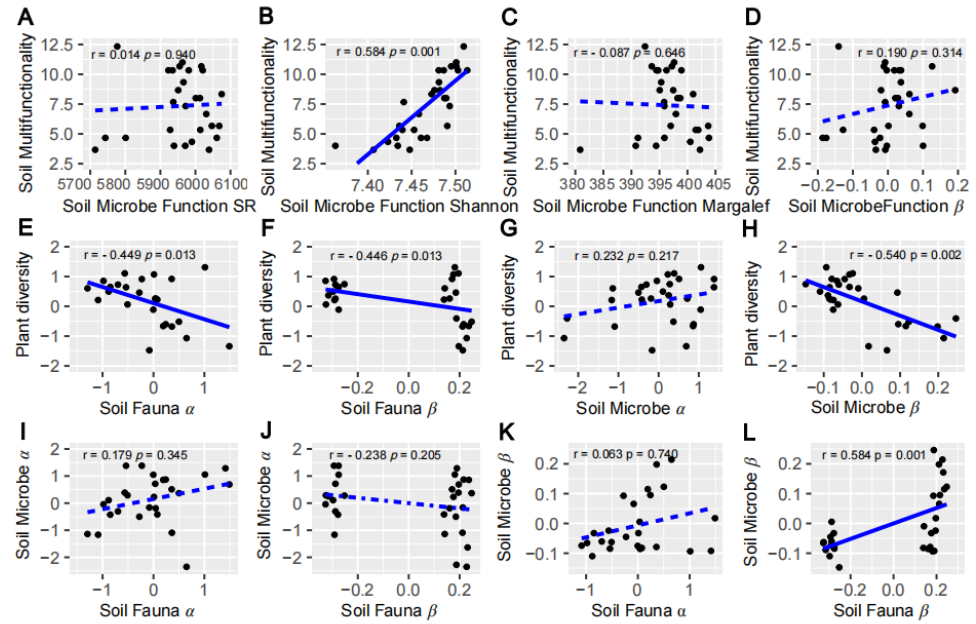

**Figure S4.** Relationship between soil microbial functional diversity index and soil multifunctionality; Relationship between soil fauna diversity and soil microbial diversity and plant diversity; Relationship between soil fauna diversity and soil microbial diversity. Plant diversity was obtained by dimensionality reduction of SR index, Shannon-Winner index and Margalef index. The  $\alpha$  diversity of soil fauna was obtained by the dimensionality reduction of soil animal SR index, soil fauna Shannon-Winner index and soil fauna Margalef index. Soil microbial  $\alpha$  diversity was obtained from soil microbial SR index, soil microbial Shannon-Winner index and soil microbial Margalef index.

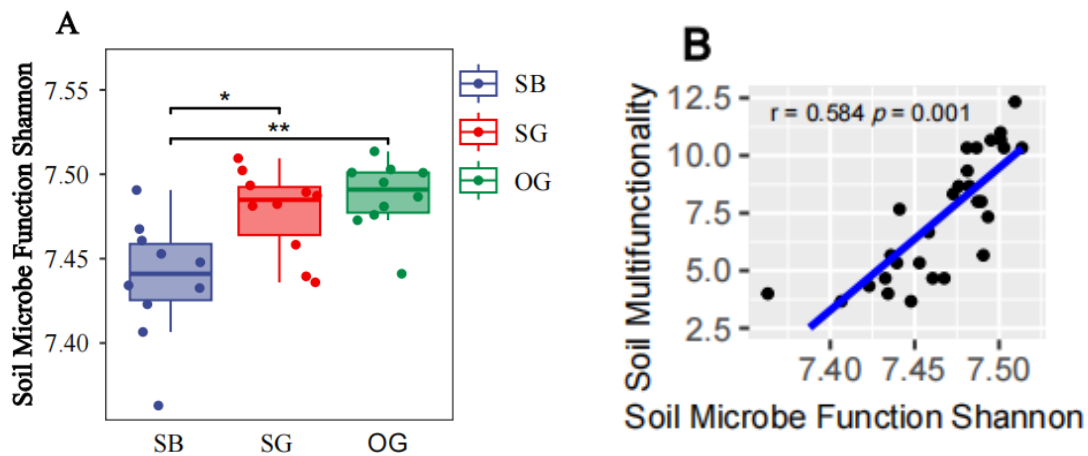

**Figure S5.** Responses of soil microbial function diversity to the restoration stage (A); Relationship between soil microbial function diversity and soil multifunctionality (B). The  $p$  value represents the total difference between groups and indicates the significance level of differences between groups (\*,  $p < 0.05$ ; \*\*,  $p < 0.01$ ).

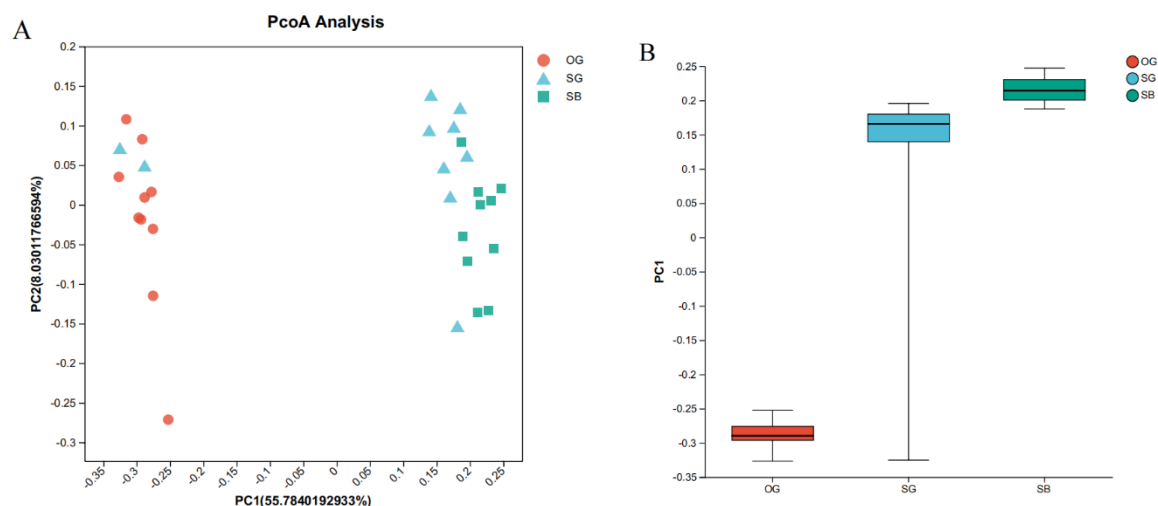

**Figure S6.** PCoA analyses of the three natural recovery stages, where the distances of the points represent the distances of the samples, and samples in the same area on the plane are shown to be similar. PC1 and PC2 represent the first two principal component factors influencing the functional composition of the samples (A); The box-and-line plot represents the discrete distribution of samples on the PC1 axis for different grouping conditions (B).

**Table S1.** Number and proportion of deciduous species during natural restoration.

| Restoration Stage | Number of Deciduous Species | Proportion Of Deciduous Species |
|-------------------|-----------------------------|---------------------------------|
| SB                | 22                          | 28.95%                          |
| SG                | 36                          | 21.56%                          |
| OG                | 38                          | 23.17%                          |

**Table S2.** OTU data form for soil fauna (The form provided is an Excel spreadsheet, please double click on the form to view it).

| species | SB1 | SB2 | SB3 | SB4 | SB5 | SB6 |
|---------|-----|-----|-----|-----|-----|-----|
| OTU1    | 32  | 26  | 50  | 52  | 22  | 14  |
| OTU2    | 0   | 0   | 2   | 0   | 0   | 0   |
| OTU3    | 0   | 0   | 0   | 2   | 0   | 0   |
| OTU4    | 8   | 2   | 0   | 0   | 0   | 0   |
| OTU5    | 4   | 22  | 4   | 8   | 2   | 0   |
| OTU6    | 0   | 2   | 4   | 2   | 6   | 10  |
| OTU7    | 0   | 0   | 4   | 0   | 0   | 0   |
| OTU8    | 0   | 0   | 0   | 0   | 0   | 4   |
| OTU9    | 20  | 4   | 0   | 0   | 0   | 2   |

**Table S3.** OTU data form for soil microorganisms (The form provided is an Excel spreadsheet, please double click on the form to view it).

| species | SB1 | SB2 | SB4 | SB4 | SB5 | SB6 |
|---------|-----|-----|-----|-----|-----|-----|
| OUT1    | 0   | 0   | 0   | 4   | 0   | 0   |
| OUT2    | 6   | 0   | 8   | 0   | 18  | 10  |
| OUT3    | 2   | 6   | 10  | 14  | 20  | 4   |
| OUT4    | 36  | 50  | 62  | 46  | 88  | 56  |
| OUT5    | 0   | 0   | 0   | 0   | 0   | 0   |
| OUT6    | 0   | 0   | 0   | 0   | 0   | 0   |
| OUT7    | 20  | 0   | 14  | 4   | 2   | 0   |
| OUT8    | 2   | 0   | 4   | 4   | 0   | 0   |
| OUT9    | 26  | 48  | 56  | 76  | 26  | 80  |

**Table S4.** Biodiversity index data (The form provided is an Excel spreadsheet, please double click on the form to view it).

| Stage | Plant SR | ant Shann | cant Margal | Fauna Nuroil | Fauna S | Fauna Shar |
|-------|----------|-----------|-------------|--------------|---------|------------|
| SB1   | 9.48     | 2.21      | 3.46        | 4748         | 224     | 3.682026   |
| SB2   | 10.65    | 2.11      | 3.68        | 5750         | 252     | 3.784845   |
| SB3   | 6.23     | 1.68      | 2.19        | 5210         | 249     | 3.717481   |
| SB4   | 11.64    | 2.78      | 5.19        | 5716         | 231     | 3.55612    |
| SB5   | 10.03    | 2.5       | 5.05        | 6656         | 241     | 3.757202   |
| SB6   | 11.84    | 2.77      | 5.57        | 5786         | 232     | 3.562924   |
| SB7   | 11.72    | 2.76      | 5.03        | 6242         | 235     | 3.490591   |
| SB8   | 5.44     | 1.28      | 2.96        | 5216         | 259     | 3.91907    |
| SB9   | 12.02    | 2.9       | 6.47        | 4010         | 199     | 3.541739   |

**Table S5.** Level of soil fauna classification (The form provided is an Excel spreadsheet, please double click on the form to view it).

| Domain   | Kingdom  | Phylum    | Class       | Order      | Family     | Genus      |
|----------|----------|-----------|-------------|------------|------------|------------|
| d_Eukary | k_Metazo | p_Annelid | c_Clitellat | o_Enchytr  | f_Enchytra | g_Enchytr  |
| d_Eukary | k_Metazo | p_Annelid | c_Clitellat | o_Hirudin  | f_Glossiph | g_Helobd   |
| d_Eukary | k_Metazo | p_Annelid | c_Polycha   | o_Capitell | f_Capitell | g_Capitell |
| d_Eukary | k_Metazo | p_Annelid | c_Polycha   | o_Phyllod  | f_Nereidic | g_Platyne  |
| d_Eukary | k_Metazo | p_Arthrop | c_Arachni   | o_Araneae  | f_Araneid  | g_Araneu   |
| d_Eukary | k_Metazo | p_Arthrop | c_Arachni   | o_Araneae  | f_Eresidae | g_Stegod   |
| d_Eukary | k_Metazo | p_Arthrop | c_Arachni   | o_Araneae  | f_Nephilic | g_Trichon  |
| d_Eukary | k_Metazo | p_Arthrop | c_Arachni   | o_Araneae  | f_Theraph  | g_Haplop   |
| d_Eukary | k_Metazo | p_Arthrop | c_Arachni   | o_Araneae  | f_Theridi  | g_Paraste  |

**Table S6.** Level of classification of soil microorganisms (The form provided is an Excel spreadsheet, please double click on the form to view it).

| Domain     | Kingdom        | Phylum    | Class      | Order       | Family      | Genus      |
|------------|----------------|-----------|------------|-------------|-------------|------------|
| d_Bacteria | k_unclassified | p_Firmicu | c_Bacilli  | o_Bacillale | f_Bacillace | g_Terriba  |
| d_Archaea  | k_unclassified | p_Euryarc | c_Halobac  | o_Halofer   | f_Halorub   | g_Haloruk  |
| d_Bacteria | k_unclassified | p_Proteob | c_Betapro  | o_Neisser   | f_Neisseri  | g_Neisser  |
| d_Bacteria | k_unclassified | p_Acidob  | c_unclassi | o_unclass   | f_unclassi  | g_unclass  |
| d_Bacteria | k_unclassified | p_Candid  | c_unclassi | o_unclass   | f_unclassi  | g_unclass  |
| d_Bacteria | k_unclassified | p_Firmicu | c_Clostrid | o_Clostric  | f_Lachnos   | g_Coproc   |
| d_Bacteria | k_unclassified | p_Firmicu | c_Bacilli  | o_Bacillale | f_Bacillace | g_Bacillus |
| d_Bacteria | k_unclassified | p_Proteob | c_Gamma    | o_Oceanc    | f_Halomog   | g_Cobetia  |
| d_Bacteria | k_unclassified | p_Proteob | c_Deltapro | o_Desulfo   | f_Desulfov  | g_Desulfo  |

**Table S7.** Results of PCoA analyses of soil fauna (The form provided is an Excel spreadsheet, please double click on the form to view it).

| Name | PC1      | PC2      | PC3      | PC4      | PC5      |  |
|------|----------|----------|----------|----------|----------|--|
| SB1  | 0.212522 | 0.015888 | 0.0442   | 0.056693 | -0.0115  |  |
| SB2  | 0.196707 | -0.07115 | -0.03183 | 0.029191 | -0.07121 |  |
| SB3  | 0.189473 | -0.0396  | -0.02967 | -0.04945 | -0.04683 |  |
| SB4  | 0.236172 | -0.05561 | -0.06255 | 0.044014 | -0.00097 |  |
| SB5  | 0.227712 | -0.13359 | -0.12878 | 0.017561 | -0.0136  |  |
| SB6  | 0.21587  | #####    | 0.063999 | 0.135082 | -0.03781 |  |
| SB7  | 0.21143  | -0.1361  | -0.13014 | -0.07631 | 0.003823 |  |
| SB8  | 0.231428 | 0.005545 | 0.036256 | 0.085867 | 0.06368  |  |
| SB9  | 0.187504 | 0.079396 | -0.0055  | 0.014052 | 0.037315 |  |

**Table S8.** Results of PCoA analyses of soil microorganisms (The form provided is an Excel spreadsheet, please double click on the form to view it).

| Name | PC1      | PC2      | PC3      | PC4      | PC5      |  |
|------|----------|----------|----------|----------|----------|--|
| SB1  | 0.065601 | #####    | 0.059179 | -0.03469 | -0.02454 |  |
| SB2  | 0.017526 | -0.00774 | 0.037282 | -0.02393 | -0.00584 |  |
| SB3  | -0.09216 | 0.070078 | 0.023455 | 0.029247 | -0.00255 |  |
| SB4  | 0.115067 | 0.166802 | -0.0266  | -0.04624 | 0.096028 |  |
| SB5  | 0.21434  | 0.066692 | -0.07779 | -0.04468 | -0.02691 |  |
| SB6  | 0.095275 | 0.027999 | 0.087875 | 0.042626 | 0.017398 |  |
| SB7  | 0.19821  | -0.10922 | 0.035373 | 0.072949 | -0.01149 |  |
| SB8  | 0.171334 | 0.098162 | -0.0043  | -0.02688 | -0.06053 |  |
| SB9  | 0.246199 | -0.07739 | -0.04754 | 0.052305 | -0.00882 |  |

**Table S9.** Basic information on the vegetation of the sample site.

| Stage | Average Height (m) | Average DBH (CM) | Number of Species | Main Dominant Species                                     |
|-------|--------------------|------------------|-------------------|-----------------------------------------------------------|
| OG    | 6.388              | 6.56             | 152               | <i>Lindera communis</i> ; <i>Celtis sinensis</i>          |
| SG    | 5.694              | 5.5              | 172               | <i>Platycarya strobilacea</i> ; <i>Cornus parviflorus</i> |
| SB    | 4.344              | 3.399            | 72                | <i>Acer wangchii</i> ; <i>Boniodendron minus</i>          |

## References

1. Hooper, D.U.; Vitousek, P.M. Effects of plant composition and diversity on nutrient cycling. *Ecol. Monogr.* **1998**, *68*, 121-149, doi:10.1890/0012-9615(1998)068[0121:EOPCAD]2.0.CO;2.
2. Gamfeldt, L.; Hillebrand, H.; Jonsson, P.R. Multiple functions increase the importance of biodiversity for overall ecosystem functioning. *Ecology* **2008**, *89*, 1223-1231, doi:10.1890/06-2091.1.
